# Supplementary material for: Wearable sensors for clinical applications in epilepsy, Parkinson’s disease, and stroke: a mixed-methods systematic review
Source: J Neurol. 2018 Feb 9;265(8):1740–52. doi: 10.1007/s00415-018-8786-y (PMC6060770; doi:10.1007/s00415-018-8786-y)
Supplement: Supplementary file 2 — Supplementary material 2 (XLSX 35 kb) [file 415_2018_8786_MOESM2_ESM.xlsx]

## Sheet: GOOD
Wearable sensors for clinical applications in epilepsy, Parkinson’s disease and stroke: A mixed-methods systematic review						Journal of Neurology
Dongni Johansson1, Kristina Malmgren1, Margit Alt Murphy1
1Dept. of Clinical Neuroscience, Institute of Neuroscience and Physiology, Sahlgrenska Academy, University of Gothenburg, Gothenburg, Sweden
Correspondence: Dongni Johansson, Department of Clinical Neuroscience, Institute of Neuroscience and Physiology, Sahlgrenska Academy, University of Gothenburg, Gothenburg, Sweden
	Title and abstract		Introduction		Method																			Result													Discussion				Other information
	1		2	3	4	5	6.(a)			6.(b)		7	8	9	10	11	12. Statistical methods							13. Participants			14. Descriptive data			15. Outcome data			16. Main results			17.	18	19	20	21	22
	(a)	(b)	Background/rationale	Objectives	study design	setting	Cohort	Case-Control	Cross-sectional	Cohort	Case-control	Variables	Data source/measurements	Bias	Study size	Quantitative variables	(a)	(b)	( c )	(d)			( e)	(a)	(b)	( c)	(a)	(b)	( c)	Cohort	Case-control	Cross-sectional	(a)	(b)	(c )	Other analyses	Result	Limitations	Interpretation	Generalisability	Funding
Askim, T., et al. (2013)stroke	Y	Y	Y	Y	Y	Y	Y			N/A		Y	Y	Y	N	Y	Y	N	Y	Y			N	Y	Y	Y	Y	N	N/A	Y			Y	Y	N/A	Y	Y	Y	Y	Y	Y	G
Barak, S., et al. (2014)stroke	Y	Y	Y	Y	Y	Y			Y	N/A		Y	Y	Y	Y	Y	Y	N/NA	N/Y			N/A	N	Y	Y	Y	Y	N	N/A			Y	Y	Y	N/A	Y	Y	Y	Y	Y	Y	G
Bayly, J., et al. (2013)ep	y	Y	Y	Y	Y	Y			Y	N/A		Y	Y	Y	N/Y	Y	Y	N/A	N			N/A	Y	Y	Y	N	Y	Y	N/A			Y	Y	Y	N/A	Y	Y	N	Y	Y	Y	G
Cavanaugh, J. T., et al. (2012)PD	Y	Y	Y	Y	Y	Y	Y			N/A		Y	Y	Y	N	Y	Y	N/A	Y	Y			N	Y	N/Y	N	Y	N/Y	N/Y	Y			Y	Y	Y	N	Y	Y	Y	Y	Y	G
de Niet, M., et al. (2007)stroke	Y	Y	Y	Y	Y	Y			Y	N/A		Y	Y	Y	N	Y	Y	Y/NA	N			N/A	N	Y	Y	N	Y	N	N/A			Y	N	Y	N/A	Y	Y	Y	Y	Y	Y	G
Fulk, G. D., et al. (2014) Stroke	Y	Y	Y	Y	Y	Y			Y	N/A		Y	Y	Y	Y	Y	Y	Y	N			N/A	N	Y	N	N	Y	Y	N/A			Y	Y	Y	N/A	Y	Y	Y	Y	Y	N	G
Gebruers, N., et al. (2013)Stroke	Y	Y	Y	Y	N	Y			Y	N/A		Y	Y	N	N	Y	Y	Y	N			N/A	Y	Y	Y	N	Y	N	N/A			Y	N	Y	N/A	Y	Y	N	Y	Y	Y	G
Gebruers, N., et al. (2008). Stroke	Y	Y	Y	Y	Y	Y			Y	N/A		Y	Y	N	N	Y	Y	Y	N			N/A	Y	Y	Y	N	Y	N	N/A			Y	N	Y	N/A	Y	Y	Y	Y	Y	Y	G
Hale, L. A., et al. (2008). PD+Stroke	Y	Y	Y	Y	Y	Y	Y			N/A		Y	Y	N	Y	Y	Y	N	Y	N			Y	Y	Y	N	Y	N	Y	Y			Y	N	N	Y	Y	Y	Y	Y	Y	G
Horne, M. K., et al. (2015) PD	N	Y	Y	Y	N	Y			Y	N/A		Y	Y	N	N	Y	Y	P	N			N/A	N	Y	N	N	Y	N	N/A			Y	N	Y	N	Y	Y	P	Y	Y	Y	G
Iluz, T., et al. (2014)PD	N	Y	Y	Y	N	Y			Y	N/A		Y	Y	Y	N	Y	Y	N	N			N/A	Y	Y	N	N	Y	N	N/A			Y	Y	N	Y	Y	Y	Y	Y	Y	Y	G
Lopane, G., et al. (2015)PD	Y	Y	Y	Y	Y	Y			Y	N/A		Y	Y	N	N	Y	Y	Y	N			N/A	Y	Y	N/A	N	Y	N/A	N/A			Y	Y	Y	N	Y	Y	Y	Y	Y	N	G
Lord, S., et al. (2008)PD	Y	Y	Y	Y	Y	Y			Y	N/A		Y	Y	Y	N	Y	Y	Y	N			N/A	Y	Y	N	N	Y	N	N/A			Y	Y	N	N	Y	Y	N	Y	P	N	G
Maglione, J. E., et al. (2013)PD	N	Y	Y	Y	N	Y			Y	N/A		Y	Y	N	N	Y	Y	Y	Y			N/A	N	Y	Y	Y	Y	N	N/A			Y	N	Y	N	Y	Y	Y	Y	Y	Y	G
Mancini, M., et al. (2012)PD	Y	Y	Y	Y	Y	Y	Y			Y		Y	Y	N	N	Y	Y	Y	Y			N	N	Y	Y	N	Y	Y	N	Y			Y	N	N	Y	Y	P	Y	Y	Y	G
Mudge, S. and N. S. Stott (2008)	Y	Y	Y	Y	Y	Y	Y			N/A		Y	Y	N	N	Y	Y	Y	Y			N	Y	Y	Y	N	Y	N	Y	Y			Y	Y	N	Y	Y	Y	Y	Y	N	G
Mudge, S., et al. (2007)	Y	Y	Y	Y	Y	Y			Y	N/A		Y	Y	Y	Y	Y	Y	Y	N			N/A	Y	Y	N/A	N	Y	N	N/A			Y	Y	Y	N	Y	Y	Y	Y	Y	Y	G
Prajapati, S. K., et al. (2011)	N	Y	Y	Y	N?	Y			Y	N/A		Y	Y	N	N	Y	Y	N	N			N/A	N	Y	Y	N	Y	Y	N/A			Y	Y	N	N	Y	Y	Y	Y	Y	Y	G
Pulliam, C. L., et al. (2014)PD	Y	Y	Y	Y	N?	Y			Y	N/A		Y	Y	Y	N	Y	Y	N	N			N/A	Y	Y	N	N	Y	P	N/A			Y	Y	N	N	N?	Y	P	Y	Y	Y	G
Rand, D., et al. (2009)Stroke	Y	Y	Y	Y	Y	Y			Y	N/A		Y	Y	N	N	Y	Y	Y	N			N/A	Y	Y	N/A	N	Y	N	N/A			Y	Y	N	N	Y	Y	Y	Y	Y	Y	G
Rodriguez-Molinero, A., et al. (2015)PD	Y	Y	Y	Y	Y	Y			Y	N/A		Y	Y	Y	N	Y	Y	Y?	N			N/A	Y	Y	N	Y	Y	Y?	N/A			Y	Y	Y	N	Y	Y	Y	Y	Y	Y	G
Sanchez, M. C., et al. (2015)Stroke	Y	Y	Y	Y	Y	Y	Y			N/A		Y	Y	Y	N	Y	Y	Y	Y	N			N	Y	Y	Y	Y	N	Y	Y			Y	N	N	Y	Y	Y	Y	Y	N	G
Thrane, G., et al. (2011) Stroke	N	Y	Y	Y	Y	Y			Y	N/A		Y	Y	Y	N	Y	Y	Y	N			N/A	N	Y	Y	Y	Y	N	N/A			Y	Y	Y	N	Y	Y	Y	Y	Y	N	G
Tieges, Z., et al. (2015)Stroke	Y	Y	Y	Y	Y	Y	Y			N/A		Y	Y	Y	Y	Y	Y	Y	Y	Y?			N	Y	Y	Y	Y	Y	Y	Y			Y	N/A	N	N	Y	Y	Y	Y	Y	G
Urbin, M. A., et al. (2015) Stroke	Y	Y	Y	Y	Y	Y			Y	N/A		Y	Y	Y	Y	Y	Y	Y	N			Y	N	Y	N	N	Y	N	N/A			Y	N	Y	Y	Y	Y	Y	Y	Y	Y	G
Vanroy, C., et al. (2014) Stroke	Y	Y	Y	Y	Y	Y			Y	N/A		Y	Y	N	Y	Y	Y	Y	Y			Y?	Y	Y	Y	N	Y	Y	N/A			Y	Y	Y	N	Y	Y	Y	Y	Y	Y	G
Weiss, A., et al. (2014) PD	N	Y	Y	Y	Y	Y	Y			N/A		Y	Y	N	N	Y	Y	N	N	N			N	Y	Y	N	Y	N	Y	Y			Y	N	N	Y	Y	Y	Y	Y	Y	G
Uswatte, G., et al. (2006)Stroke	Y	Y	Y	Y	Y	Y			Y	N/A		Y	Y	Y	N	Y	Y	Y	N			N/A	N	Y	Y	N	Y	Y	N/A			Y	N	Y	N	N	Y	P	Y	Y	Y	G
Lang, C. E., et al. (2007)Stroke	N	Y	Y	Y	N	Y			Y	N/A		Y	Y	N	N	Y	Y	Y	N			N/A	N	Y	N	N	Y	N	N/A			Y	N	Y	N	N	Y	Y	Y	Y	Y	G
Nero, et al	N	Y	Y	Y	Y	Y			Y	N/A		Y	Y	Y	N	Y	Y	Y	N			N/A	N	Y	N	N	Y	N	N/A			Y	Y	Y	N	Y	Y	Y	Y	Y	Y	G
Velez et al., 2016	Y	Y	Y	Y	Y	Y			Y	N/A		Y	Y	Y	N	Y	Y	Y	N			N/A	Y	Y	Y	N	Y	Y	N/A			Y	N	Y	N	Y	Y	Y	Y	Y	Y	G
Heldman A.D.,et al, (2014) PD	Y	Y	Y	Y	Y	Y			Y	N/A		Y	Y	Y	Y	Y	Y	N	N			N/A	N	Y	N	N	Y	N	N/A			Y	Y	Y	N	N	Y	Y	Y	Y	Y
Mera.O.T., et al (2013) PD	N	Y	Y	Y	N	Y			Y	N/A		Y	Y	Y	N	Y	Y	Y	Y			N/A	N	Y	Y	N	Y	N	N/A			Y	Y	Y	N	Y	Y	Y	Y	Y	Y
Haeuber, E., et al. (2004). Stroke	Y	Y	Y	Y	Y	Y			Y	N/A		Y	Y	N	N	Y	Y	N	N			N/A	N	Y	Y	N	Y	Y	N/A			Y	N	Y	N	N	Y	Y	Y	Y	Y
Le Heron, C., et al. (2014) Stroke	Y	Y	Y	Y	Y	Y			Y	N/A		Y	Y	N	N	Y	Y	N	N			N/A	Y	Y	N	N	Y	N	N/A			Y	Y	N	N	Y	Y	Y	Y	Y	Y
Mancini, M., et al. (2012)PD	Y	Y	Y	Y	Y	Y			Y	N/A		Y	Y	N	N	Y	Y	Y	N			N/A	N	Y	N	N	Y	N	N/A			Y	Y	N	N	N	Y	N	Y	Y	Y
Michielsen, M. E., et al. (2012)Stroke	Y	Y	Y	Y	Y	Y			Y	N/A		Y	Y	N	N	Y	Y	Y	Y			N/A	N	Y	Y	N	Y	Y	N/A			Y	N	P	N	N	Y	Y	Y	Y	N
Morris, T. R., et al. (2012)PD	Y	Y	Y	Y	Y	Y			Y	N/A		Y	Y	Y	N	Y	Y	N	N			N/A	N	Y	N	N	Y	N	N/A			Y	Y	Y	N	N	Y	P	Y	Y	Y
Scanlon, B. K., et al. (2013)PD	N	Y	Y	Y	N	Y			Y	N/A		Y	Y	N	N	Y	Y	Y	N			N/A	N	Y	Y	N	Y	N	N/A			Y	N	P	N	N	Y	P	Y	Y	Y
Skidmore, F. M., et al. (2008) PD	Y	Y	Y	Y	N	Y			Y	N/A		Y	Y	Y	N	Y	Y	Y	N			N/A	N	Y	Y	N	Y	N	N/A			Y	N	Y	N	N	Y	Y	Y	Y	N
Uswatte, G., et al. (2005)Stroke	Y	Y	Y	Y	Y	Y			Y	N/A		Y	Y	N	N	Y	Y	Y	Y			N/A	N	Y	Y	N	Y	Y	N/A			Y	N	Y	N	Y	Y	Y	Y	Y	Y
van der Pas, S. C., et al. (2011) Stroke	Y	Y	Y	Y	Y	Y			Y	N/A		Y	Y	Y	N	Y	Y	Y	N			N/A	N	Y	N	N	Y	Y	N/A			Y	N	Y	N	Y	Y	Y	Y	Y	Y
Gubbi, J., et al. (2015).EP	N	Y	Y	Y	N	Y			Y	N/A		Y	Y	N	N	Y	Y	N	N			N/A	N	Y	N	N	Y	N	N/A			Y	Y	Y	N	Y	Y	Y	Y	Y	N
Beniczky., et al. (2013).EP	Y	Y	Y	Y	N	Y			P	N/A		Y	Y	Y	N	Y	Y	N	N			N/A	N	Y	Y	N	Y	Y	N/A			Y	Y	N	N	Y	Y	Y	Y	Y	Y
Dunnewold R.J.W., et al (1998) PD	N	Y	Y	Y	Y	Y			Y	N/A		Y	Y	N	N	Y	Y	Y	N			N/A	Y	Y	N	N	Y	N	N/A			Y	Y	Y	N	Y	Y	Y	Y	Y	N
Nijsen, T. M., et al. (2005) (EP)	N	Y	Y	Y	N	P			Y	N/A		Y	Y	N	N	Y	Y	N	N			N/A	N	Y	Y	N	Y	Y	N/A			Y	N	Y	N	P	Y	P	Y	Y	N
Ramsperger et al ., 2016	Y	Y	Y	Y	Y	Y			Y	N/A		Y	Y	Y	N	Y	Y	Y	Y			N/A	Y	Y	N	N	Y	N	N/A			Y	N	Y	N	Y	Y	Y	Y	Y	Y
Shim, S., et al. (2014)Stroke	Y	Y	Y	Y	N	Y			P	N/A		Y	Y	N	N	Y	Y	P	N			N/A	N	Y	N	N	Y	N	N/A			Y	N	Y	N	Y	Y	Y	Y	Y	Y
Yungher, D. A., et al. (2014)PD	N	Y	Y	Y	N	Y			Y	N/A		Y	Y	N	N	Y	Y	Y	N			N/A	N	Y	N	N	Y	N	N/A			Y	Y	Y	N	Y	Y	Y	Y	Y	Y
Esser, P., et al. (2012) PD	Y	Y	Y	Y	Y	Y			Y	N/A		Y	Y	Y	N	Y	Y	N	N			N/A	N	Y	N	N	Y	N	N/A			Y	Y	N	N	N	Y	Y	Y	Y	Y

## Sheet: F
	Title and abstract		Introduction		Method																			Result													Discussion				Other information
	1		2	3	4	5	6.(a)			6.(b)		7	8	9	10	11	12. Statistical methods							13. Participants			14. Descriptive data			15. Outcome data			16. Main results			17.	18	19	20	21	22
Hoff, J. I., et al. (2004)	N	Y	Y	Y	N	N			N	N/A		Y	Y	N	N	Y	Y	N/A	N/A			N/A	Y	N	N	N	Y	N	N/A			Y	N	N/A	N/A	Y	Y	Y	Y	Y	Y	F
Busse, M. E., et al. (2004)	N	Y	Y	N/Y	N	N			P=Partly	N/A		Y	Y	N	N	Y	Y	N	N			N/A	N	Y	N	N	N	N	N/A			P=Partly	P	N	N/A	N	P	P	Y	Y	Y	F
Dobkin, B. H., et al. (2011)	Y?	Y?	Y	Y	Y?	Y?			Y	N/A		Y?	Y?	N	N	Y	Y	N/A	N			N/A	N	Y	N/A	N	Y	N	N/A			P=Partly	N	N/A	N/A	N	P	Y	Y	Y	Y	F
Garcia Ruiz, P. J. and V. Sanchez Bernardos (2008).PD	N	N	N	N	N	Y			P=Partly	N/A		Y	Y	N	N	Y	N	N	N			N/A	N	N	N	N	Y	N	N/A			P=Partly	N	N	N/A	N	P	Y	P	Y	N	F
Gil-Agudo, A., et al. (2013).Stroke EX?	N
Giuberti, M., et al. (2015).PD	N	Y	Y	P	N	Y			N	N/A		Y	Y	N	N	P	P	N	N			N/A	N	N	N	N	N	N	N/A			Y	N	N	N	N	Y	Y	Y	Y	Y	F
Hoff, J. I., et al. (2001) PD	N	Y	Y	Y	N	Y			N	N/A		Y	Y	Y	N	Y	Y	Y	N			N/A	N	N	N	N	Y	N	N/A			Y	Y	N/A	N	Y	Y	P	Y	Y	Y	F
Hoff, J. I., et al. (2001) PD	N	Y	Y	N	N	Y			N	N/A		Y	Y	N	N	Y	P	Y	N			N/A	N	N	N	N	Y	N	N/A			Y	N	N	N	P	P	P	P	Y	Y	F
Iosa, M., et al. (2012)Stroke	N	P	Y	N	Y	Y			Y	N/A		Y	Y	N	N	P	Y	N	N			N/A	N	P	N	N	N	N	N/A			Y	N	Y	N	N	Y	Y	Y	Y	Y	F
Janssen, W. G., et al. (2008)Stroke	Y	Y	Y	Y	Y	Y			Y	N/A		Y	Y	N	N	Y	Y	Y	N			N/A	Y?	N	N	N	N	N	Y			Y	N	N	N	Y	Y	N	Y	Y	N	F
Keenan, D. B. and F. H. Wilhelm (2005) EX	Y	Y	P	N	Y	P			N	N/A		N	N	N	N	Y	N	N	N			N/A	N																			F
Keijsers, N. L., et al. (2003) EX	N	N	Y	Y	N	Y			N	N/A		P	Y	N	N	N	N	N	N			N/A	N																			F
Kramer, U., et al. (2011) EP	N	Y	Y	N	N	Y			Y	N/A		Y	Y	N	N	Y	N	N	N			N/A	N	Y	Y	N	N	Y	N/A			Y	N	N	N	P	Y	N	Y	Y	N	F
Manson, A. J., et al. (2000)PD	Y	Y	Y	Y	Y	Y			N	N/A		Y	Y	Y	N	Y	Y	N	N			N/A	N	N	N	N	N	Y	N/A			Y	N/Y	Y	N	N	Y	Y	Y	Y	Y	F
Mitoma, H., et al. (2010).PD	N	Y	Y	Y	N	Y			P	N/A		Y	Y	N	N	Y	P	N	N			N/A	N	N	N	N	N	N	N/A			Y	N	Y	N	Y	Y	N	Y	Y	N	F
Mizuike, C., et al. (2009)Stroke	N	Y	Y	Y	N	Y			Y	N/A		Y	Y	N	N	Y	Y	Y	N			N/A	N	N	N	N	Y	N	N/A			Y	N	N	N	N	Y	Y	Y	Y	N	F
Moore, S. T., et al. (2008)PD	Y	Y	Y	Y	N	Y			Y	N/A		Y	Y	N	N	P	N	N	N			N/A	N	Y	Y	N	Y	N	N/A			Y	N	Y	N	N	Y	P	Y	Y	Y	F
Rand, D., et al. (2010)Stroke	N	Y	Y	Y	Y	Y			Y	N/A		Y	Y	Y	N	Y	Y	N	N			N/A	N	Y	N/A	N	N	N	N/A			Y	N	N	N	N	Y	Y	Y	Y	Y	F
Saito, N., et al. (2004)PD	N	Y	Y	P	Y	Y	Y			Y		Y	Y	N	N	Y	P	P	N	N			N	Y	N	N	Y	N	Y	Y			N	Y	N	N	P	N	Y	Y	N	F
Salarian, A., et al. (2007)PD	Y	Y	Y	Y	Y	Y			Y	N/A		Y	Y	N	N	Y	Y	Y	N			N/A	Y	N	N	N	N	N	N/A			Y	N	N	N	Y	Y	N	Y	Y	Y	F
Simone, L. K., et al. (2007)Stroke	Y	Y	Y	Y	Y	Y			Y	N/A		Y	Y	N	N	Y	P	N	N			N/A	N	N	N	N	N	N	N/A			Y	N	N	N	N	Y	N	Y	Y	Y	F
Terashi, H., et al. (2014) PD	N	Y	Y	Y	N?	Y			Y	Y		Y	Y	N	N	N	Y	N	N			N/A	N	N	N	N	Y	N	Y			N	N	N	N	N	Y	P	Y	Y	N	F
Thielgen, T., et al. (2004) PD	N	Y	Y	Y/P	N	Y			P	N/A		Y	Y	N	N	Y	Y	Y	N			N/A	N	Y	N	N	N	N	N/A			Y	N	N	N	Y	Y	Y	Y	Y	N	F
Trojaniello, D., et al. (2014)Stroke	N	Y	Y	Y	N	Y			N	N/A		Y	Y	N	N	Y	Y	Y	N			N/A	Y	N	N	N	N	N/A	N/A			Y	Y	N	N	Y	Y	P	Y	Y	Y	F
Weiss, A., et al. (2011) PD	N	Y	Y	Y	N?	Y			Y	N/A		Y	Y	N	N	Y	Y	N	N			N/A	N	Y	N	N	P	N	N/A			Y	N	N	N	N	Y	P	Y	Y	Y	F
Yokoe, M., et al. (2009) (PD	Y	Y	Y	Y	N	Y		Y			Y	Y	Y	N	N	Y	Y	N	N		N		N	N	N	N	N	N	N/A		Y		N	N	N	Y	Y	N	Y	Y	Y	F
Hasmann, S. E., et al. (2014) PD	Y	Y	Y	P	Y	Y			Y	N/A		P	Y	N	N	Y	Y	Y	N			N/A	Y	N	N	N	Y	N	N/A			Y	N	N	N	Y	Y	Y	Y	Y	Y	F
Lee, H. J., et al. (2015)PD	Y	Y	Y	Y	Y	Y			N	N/A		Y	Y	Y	N	Y	Y	N	N			N/A	N	P	N	N	N	N	N/A			Y	N	N	N	N	Y	Y	Y	Y	Y	F
Louter, M., et al. (2014)PD	Y	Y	Y	Y	Y	Y			P	N/A		Y	Y	N	N	Y	Y	N	N			N/A	Y	Y	Y	N	Y	N	N/A			Y	N	N	N	Y	Y	P	Y	Y	Y	F
Rocchi, L., et al. (2014)PD	N	Y	Y	Y	Y	Y			Y	N/A		Y	Y	N	N	Y	Y	Y	N			N/A	Y	N	N	N	Y	N	N/A			Y	N	N	N	Y	Y	P	Y	Y	Y	F
Salarian, A., et al. (2010)PD	Y	Y	Y	Y	Y	Y			Y	N/A		Y	Y	Y	N	Y	Y	P	N			N/A	Y	N	N	N	N	N	N/A			Y	Y	N	N	Y	Y	N	Y	Y	Y	F
Weiss, A., et al. (2015)PD	N	Y	Y	Y	N/Y	Y	Y			Y		Y	Y	N	N	N	Y	N	N	N			N	Y	N	N	Y	N	Y	Y			N	N	N	N	Y	Y	Y	Y	Y	F
Keijsers, N. L., et al. (2000)PD	Y	Y	Y	Y	N	Y			Y	N/A		Y	Y	Y	N	Y	Y	N	N			N/A	N	N	N	N	N	N	N/A			Y	Y	N	N	Y	Y	P	Y	Y	Y	F
Mansfield, A., et al. (2015) Stroke	Y	Y	Y	Y	Y	Y	Y			N/A		Y	Y	Y	Y	Y	Y	Y	Y			Y	N	Y	Y	Y	Y	Y	Y	Y			Y	N	N	Y	Y	Y	Y	Y	Y	F
Braybrook et al	N	Y	Y	Y	N	Y			N	N/A		Y	Y	N	N	Y	P	N	N			N/A	N	N	N/A	N	N	N	N/A			Y	N	Y	N	Y	P	P	Y	P	P	F
Dijkstra, B., et al. (2008)	Y	Y	Y	Y	Y	Y			Y	N/A		Y	Y	Y	N	Y	Y	Y	N			N/A	N	Y	N	N	Y	N	N/A			P=Partly	P	N/NA	N/A	Y	Y	Y	Y	Y	Y	F
Djuric-Jovicic, M. D., et al. (2014)	N	Y	Y	N	N	Y			Y	N/A		Y	Y	N	N	Y	N	N/A	N			N/A	N	N	N	N	Y	N	N/A			Y	Y	Y	N/A	Y	Y	Y	Y	N	Y	F
Fazio, P., et al. (2013) PD	N	Y	Y	Y	N	Y			N	N/A		Y	Y	N	N	Y	Y	N	N			N/A	N	N	N	N	Y	N	N/A			Y	Y	N	N/A	Y	Y	N	Y	Y	Y	F
Gebruers, N., et al. (2014). Stroke	Y	Y	Y	Y	N	Y	P			N/A		Y	Y	N	N	Y	Y	N	N	N			Y	Y	Y	N	Y	Y	N	Y			N	Y	N/A	Y	Y	Y	Y	Y	Y	F
Hodt-Billington, C., et al. (2008) Stroke	N	Y	Y	Y	N	Y			Y	N/A		Y	Y	Y	N	Y	Y	Y	N			N/A	Y	N	N	N	Y	N	N/A			Y	Y	N	N	Y	Y	Y	Y	Y	N	F
King, L. A., et al. (2012) PD	N	Y	P	Y	N	Y			Y	N/A		Y	Y	N	N	Y	Y	Y	N			N/A	N	N	N	N	Y	N	N/A			P	N	N	N	Y	Y	Y	Y	Y	Y	F
Griffiths RI., el.al. (2012) PD	N	P	Y	P	N	P			P	N/A		Y	Y	N	N	Y	Y	N	N			N/A	N	Y	N	N	N	N	N/A			Y	Y	Y	N	N	Y	P	Y	Y	Y	F
Kotschet K., et al. (2014) PD	N	P	Y	N	N	Y			Y	N/A		Y	Y	N	N	Y	N	N	N			N/A	N	Y	N	N	Y	N	N/A			Y	N	Y	N	Y	Y	N	Y	Y	Y	F
Giuffrida JP., et al. (2009) PD	N	Y	Y	Y	N	Y			N	N/A		Y	Y	Y	N	N	Y	N	N			N/A	N	Y	N	N	N	N	N/A			Y	N	Y	N	N	Y	N	Y	Y	Y	F
Braybrook., et al (2016) PD	N	Y	Y	Y	N	P			Y	N/A		Y	Y	N	N	Y	Y	N	N			N/A	Y	Y	N	N	N	N	N/A			Y	N	Y	N	Y	Y	P	Y	Y	N	F

## Sheet: QUAL
	Was there a clear statement of the aims of the research			Was there an adequate description of study methodology			Was the research design appropriate to address the aims of the research			Was the recruitment strategy appropriate to the aims of the research?			Was the data collected in a way that addressed the research issue?			Has the relationship between researcher and participants been adequately considered?			Have ethical issues been taken into consideration?			Was the data analysis sufficiently rigorous?			Is there a clear statement of findings?
	Y	Can't tell	N
Cancela, J., et al. (2014)	Y			Y			Y			Y			Y					N			N	Y			Y
Ferreira, J. J., et al. (2015)	Y				P		Y			Y			Y				P		Y			Y				P
Fisher, J. M., et al. (2016)	Y			Y			Y			Y			Y					N	Y			Y			Y
Giorgino, T., et al. (2009) survey	Y				P		Y			Y			Y			Y				P		Y				P
Giorgino, T., et al. (2009) QUESTIONNAIRE	Y			Y			Y			Y			Y					N			N		P			P
Simone, L. K., et al. (2007)	Y			Y			Y			Y			Y					N	Y			Y			Y
Zhao, Y., et al. (2015)	Y			Y			Y					N	Y					N	Y			Y			Y
Mountain. G ,. et al (2015)	Y			Y			Y					N	Y			Y			Y			Y			Y
Hoppe c., et al. (2015)	Y			Y			Y			Y			Y					N	Y			Y			Y
